# Supplementary material for: Rapid authentication of Indonesian edible bird's nests by near-infrared spectroscopy and chemometrics
Source: Royal Society of Chemistry journal article supplement (doi:10.1039/c6ay03352k), 2017-01-01
Supplement: c6ay03352k1.pdf [file c6ay03352k1.pdf]

[1] HPLC chromatograms of standard and EBN sample were shown in Figure 1.

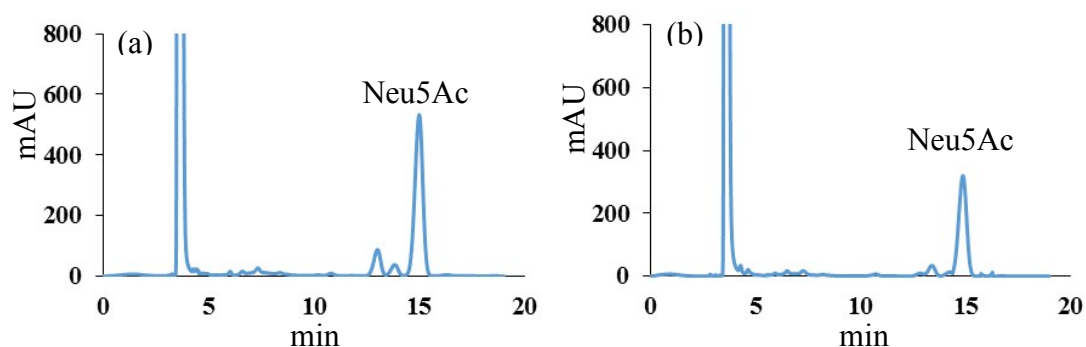

Figure 1 HPLC chromatograms of standard (a) and an EBN sample (b)

[2] Data of the standard curve were shown in Table 1 and Figure 2.

Table 1 data of the standard curve

| No.      | 1    | 2     | 3      | 4      | 5      | 6       | 7       | 8       | 9       | 10       | 11       |
|----------|------|-------|--------|--------|--------|---------|---------|---------|---------|----------|----------|
| C(ug/ml) | 0.1  | 1     | 5      | 10     | 25     | 50      | 100     | 200     | 400     | 750      | 1000     |
| Areas    | 1531 | 38255 | 148402 | 277139 | 679957 | 1338476 | 2687706 | 5110677 | 9972187 | 18289088 | 24184689 |

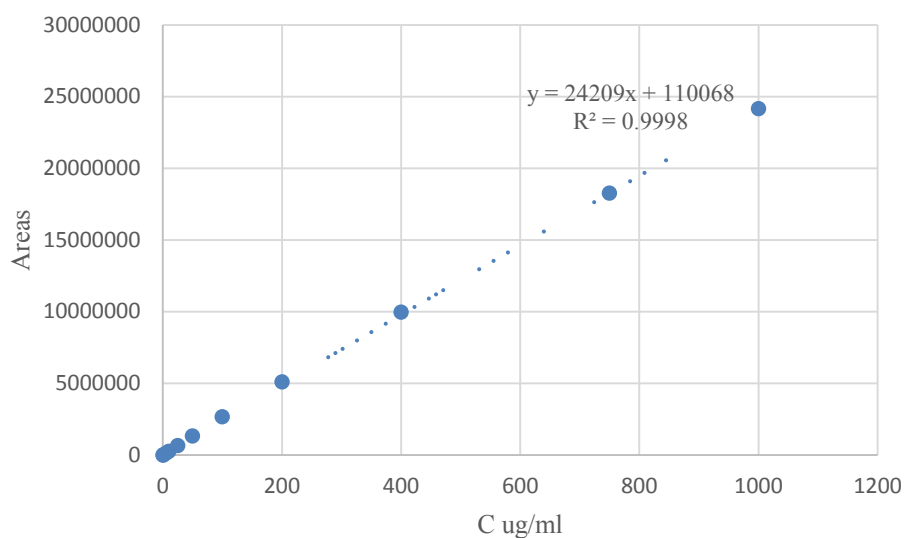

Figure 2 the standard curve used in this study

[3] The raw spectral data of genuine/adulterated EBN samples and the raw spectral after SNV preprocessing were shown in Figure 3.

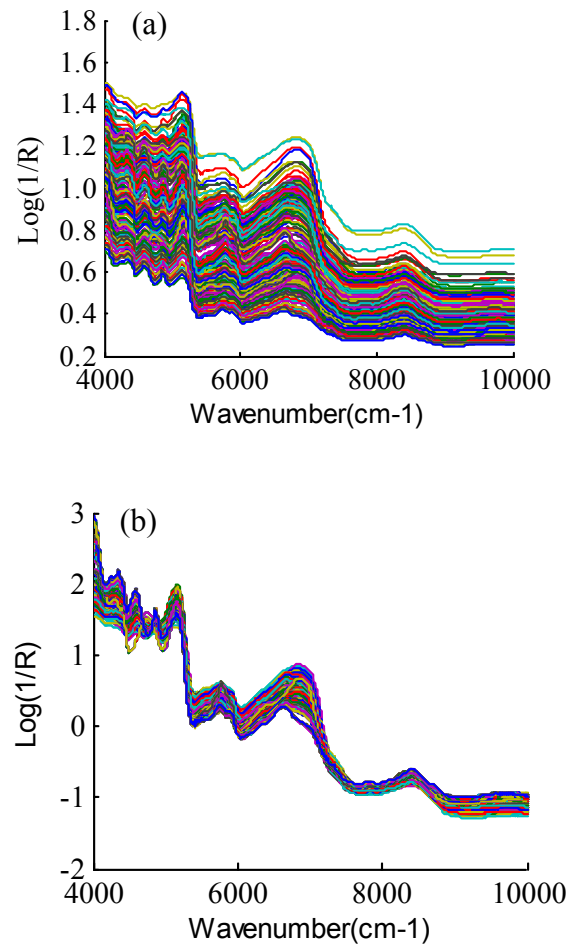

Figure 3 raw spectra (a), preprocessed NIR spectra (b) of genuine/adulterated EBNs

[4] The raw spectral data of PDO ENBs and the raw spectral after SNV preprocessing were shown in Figure 4.

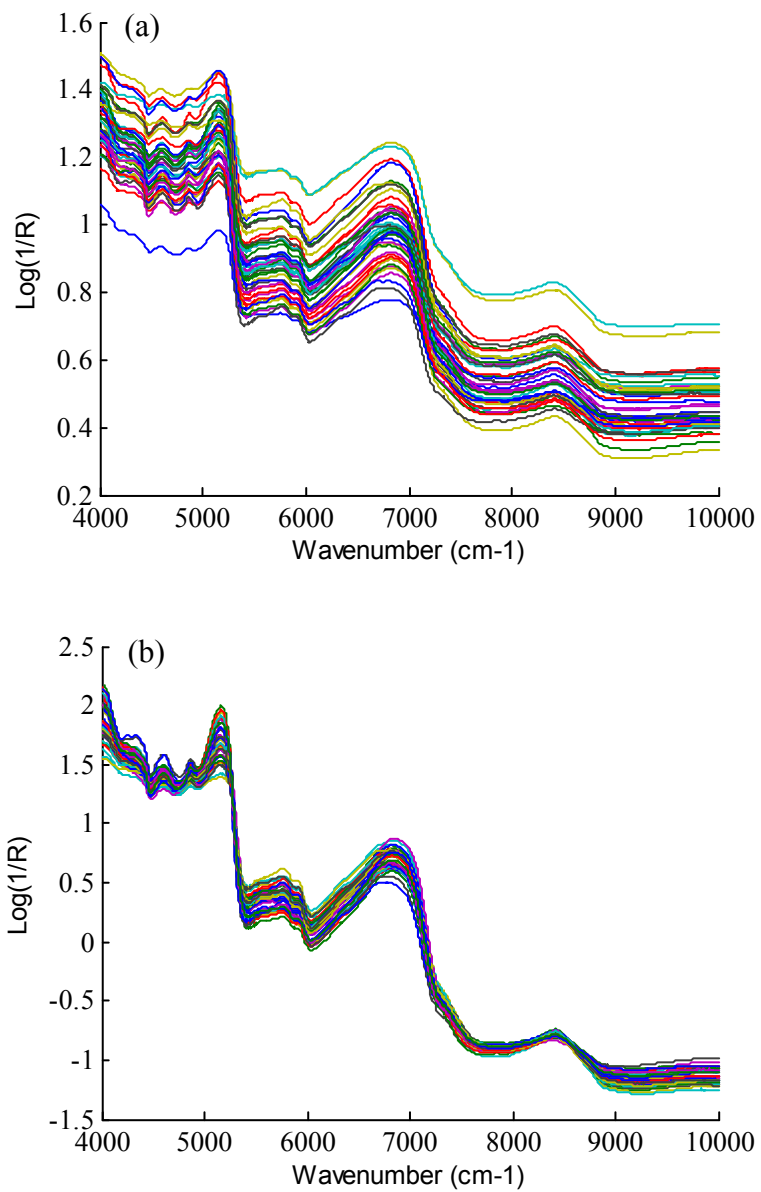

Figure 4 the raw spectral data of PDO ENBs (a) and the raw spectral after SNV preprocessing (b)
